# Supplementary material
Source: MDPI journal article supplement (https://www.mdpi.com/1996-1073/17/10/2261)
Supplement: s1 [file s1]

# Role of foreign phases, synergistic effects, and morphology in the HER performance of trimetallic pentlandites with unequimolar Co:Fe:Ni ratio

Maciej Kubowicz, Miłosz Kozusznik, Tomasz Kurek, Krzysztof Mars and Andrzej Mikula\*

Faculty of Materials Science and Ceramics, AGH University of Krakow, al. Mickiewicza 30-059 Krakow, Poland

\* Correspondence: [amikula@agh.edu.pl](mailto:amikula@agh.edu.pl)

**Abstract:** Since pentlandites are among the most promising catalysts for hydrogen evolution reactions (HER), in this study, we investigated the influence of different cobalt, iron, and nickel substitutions in the cationic sublattice and the form of the material (powder, ingot, sintered pellet) on catalytic performance. This complements previous results regarding a multi-component approach in these chalcogenides. It was shown that in the case of sulfur-rich pentlandites with non-equimolar ratio of Co, Fe, and Ni, the impact of intrinsic material properties is smaller than surface-related effects. Among powder forms, catalysts based on a combination of Fe and Co perform the best. However, in volumetric forms, extremely high contents of individual metals are favorable, albeit associated with active precipitations of foreign phases. The presence of these phases positively affects the recorded currents but slows down the reaction kinetics. These findings shed light on the nuanced interplay between material composition, form, and HER properties, offering insights for tailored catalyst design.

## 1. Sample preparation and structural measurements

The materials post-synthesis were proceed into working electrodes in three forms: powders, ingots, and sintered pellets. The obtained ingots were either ground into powder or suitable flat fragments were cut out from them. The powders were also used to craft sintered pellets. The grain size analysis of the powder particles after normalized grinding procedure is presented in Figure S1.

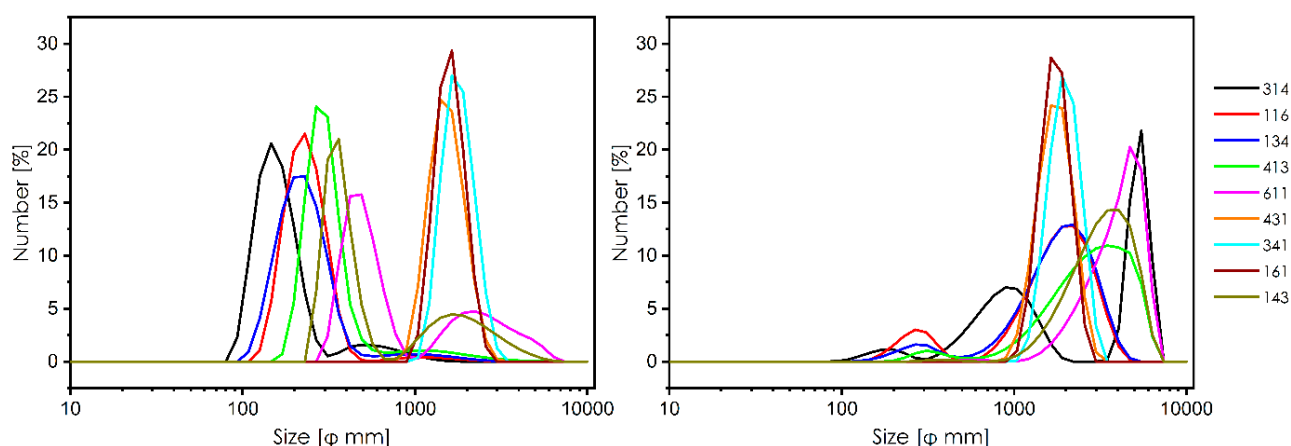

Figure S1. DLS results of the particles size as a function of (a) number and (b) volume distribution.

Powder catalysis preparation. The powder on the screen-printable electrodes was applied from a mixture of: 7.5 mg powder; 1050  $\mu\text{m}$  distilled water; 300  $\mu\text{m}$  isopropanol; 150  $\mu\text{m}$  nafion D-520 dispersion, and then sonicated for 20 minutes. Approximately 4  $\mu\text{l}$  of the sample solution was then applied by drop-casting to a screen-printing electrode and left to dry. Figure S2 shows microscopic images (taken by *Olympus SZX7 optical microscope*) of each of the applied samples.

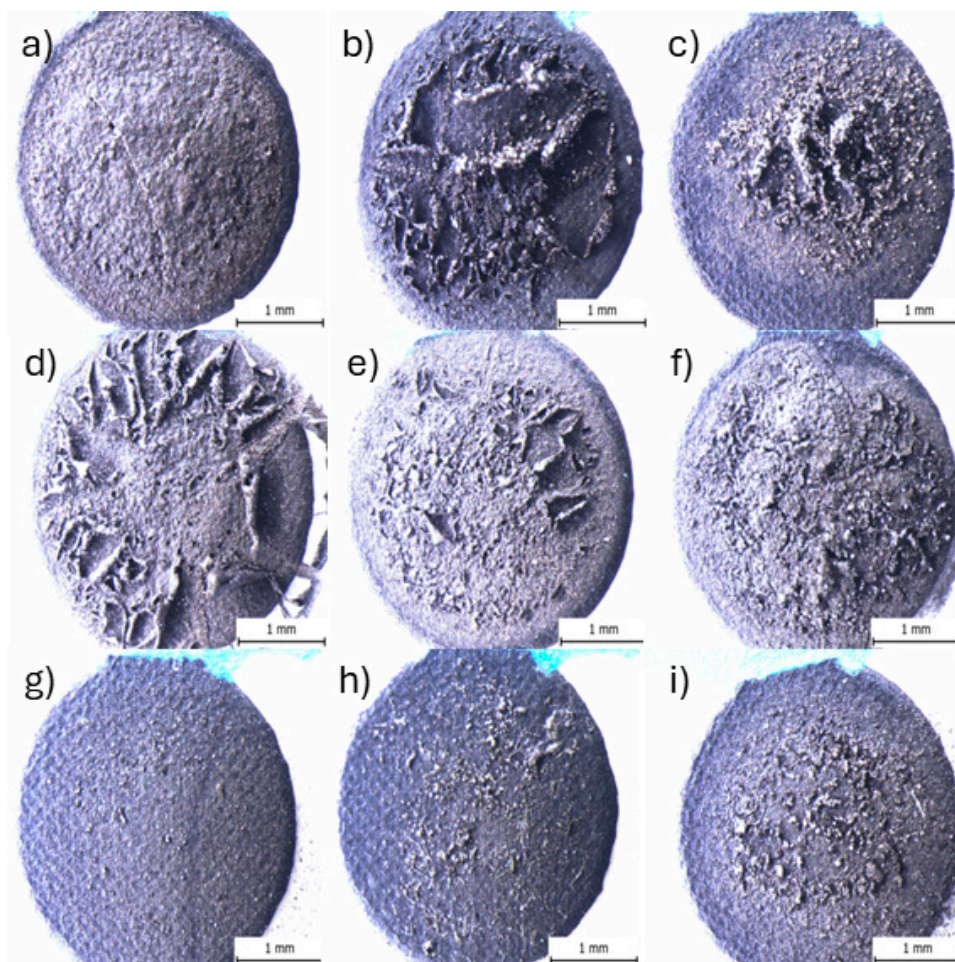

Figure S2. Photos of powders applied to screen-printable electrodes (a) Po314; (b) Po116; (c) Po134; (d) Po413; (e) Po611; (f) Po431; (g) Po341; (h) Po161; (i) Po143.

Ingots and pellets catalysis preparation. Prior to electrochemical measurements, the ingots and pellets were carefully polished using sandpaper and  $\text{Al}_2\text{O}_3$  polishing paste. An electrode was then constructed from each sample by attaching the sample directly to a platinum wire and placing it in a glass holder, then using silicone to isolate the wire from access to the electrolyte.

Inductive Hot Pressing (IHP) consolidating process. The powders were inserted into graphite molds and sintered by using of custom-made apparatus. The process was carried out under the following conditions: rinsing with Argon (0.5 atm) at room temperature; heating to 200  $^{\circ}\text{C}$  with a heating rate of 100  $^{\circ}\text{C}/\text{min}$ ; annealing at this temperature for 5 minutes to eliminate stresses; heating to 400  $^{\circ}\text{C}$  with a heating rate of  $^{\circ}\text{C}/\text{min}$ ; annealing at this temperature for 14 minutes with applied pressure of 50 [MPa] and 1 minute

without pressure; cooling to room temperature. The powders were consolidated into pellets with a diameter of 10 [mm] and height of about 0.3 [cm]. These are standard conditions we have used in our previous studies on pentlandites, facilitating comparability [30,31].

The density of the as-sintered pellets and ingots are presented in Table S1. The density was estimated using Archimedes principle.

Table S1. Density of the ingot and sintered pellet samples

| Sample               | In314 | In116 | In134 | In413 | In611 | In431 | In341 | In161 | In143 |
|----------------------|-------|-------|-------|-------|-------|-------|-------|-------|-------|
| Relative density [%] | 90,77 | 91,43 | 91,68 | 95,02 | 90,08 | 88,69 | 87,31 | 85,24 | 89,92 |
| Sample               | Pe314 | Pe116 | Pe134 | Pe413 | Pe611 | Pe431 | Pe341 | Pe161 | Pe143 |
| Relative density [%] | 88,14 | 92,87 | 86,38 | 92,77 | 79,84 | 80,52 | 84,56 | 91,08 | 83,46 |

Structural investigation. A summary of the phase composition together with fitting parameters are presented in the main article. Scanning Electron Microscope (SEM) micrographs, together with elements distribution at the respective surfaces (EDX) for all materials' form are presented in Figures S3–S5.



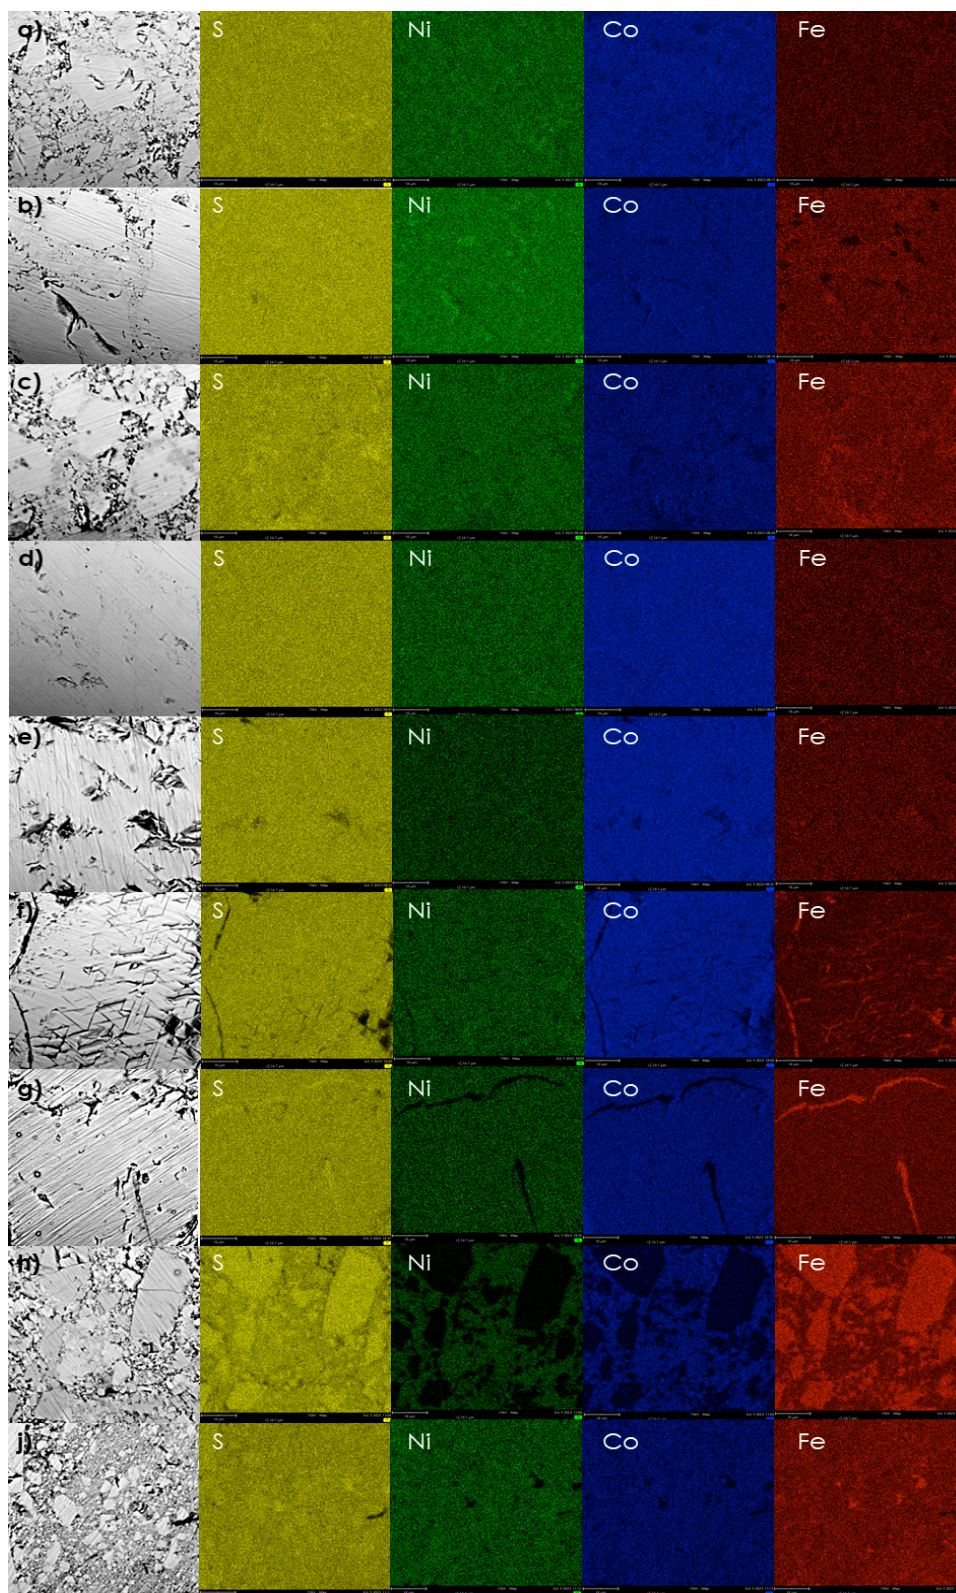

Figure S3. SEM micrographs together with EDX mapping for: (a) Pe314; (b) Pe116; (c) Pe134; (d) Pe413; (e) Pe611; (f) Pe431; (g) Pe341; (h) Pe161; (i) Pe143.



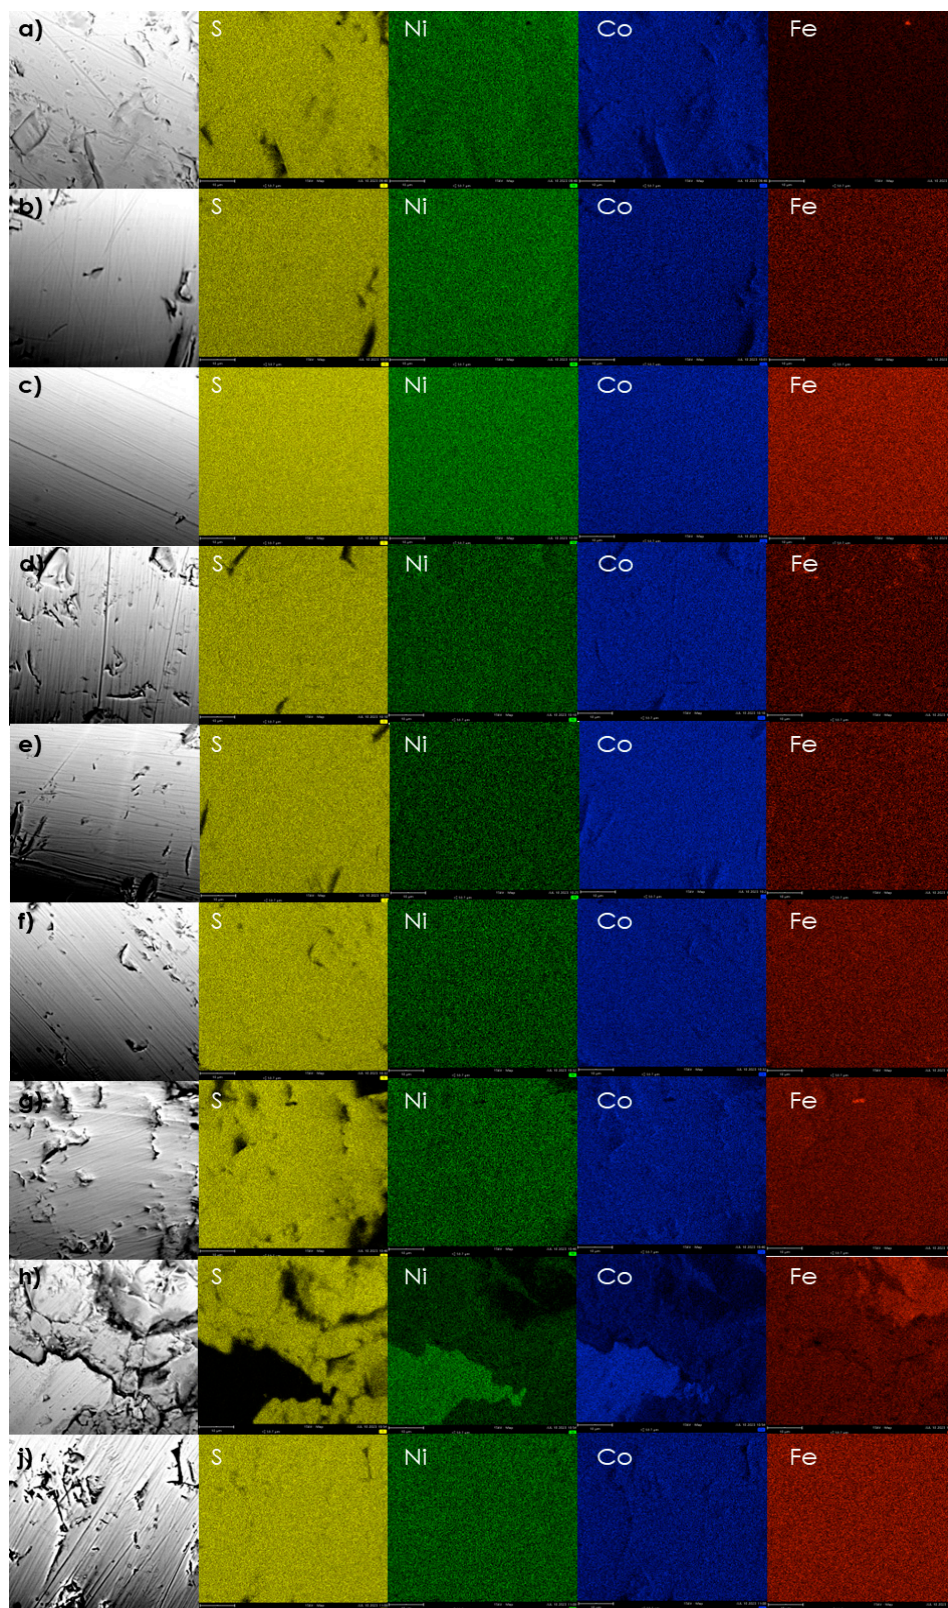

Figure S4. SEM micrographs together with EDX mapping for: (a) In314; (b) In116; (c) In134; (d) In413; (e) In611; (f) In431; (g) In341; (h) In161; (i) In143.



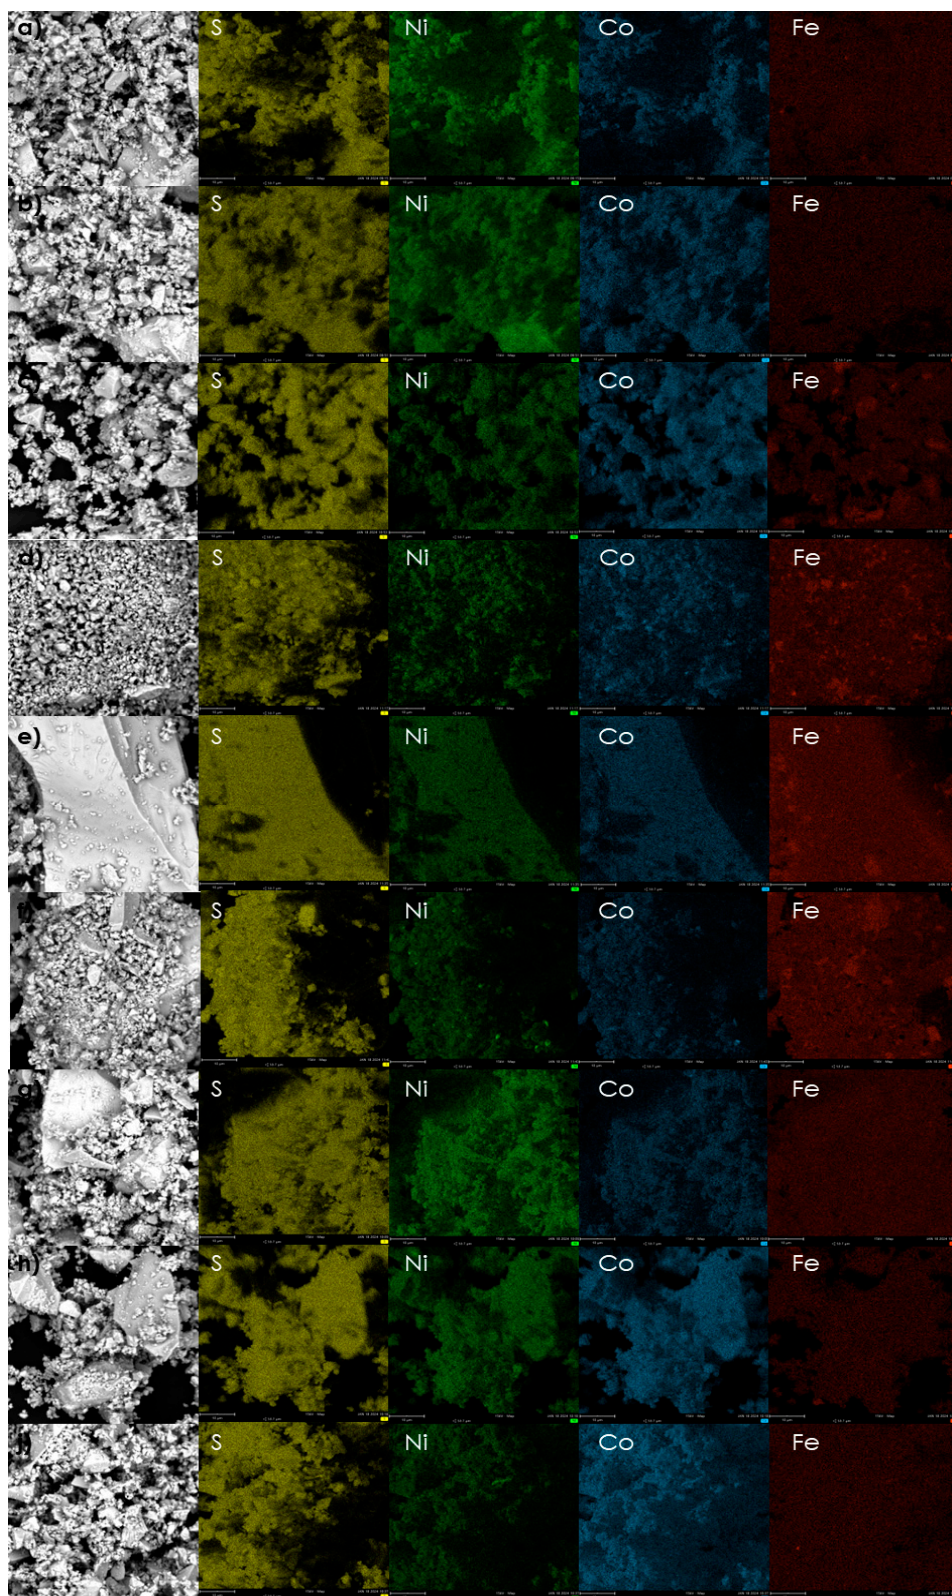

Figure S5. SEM micrographs together with EDX mapping for: (a) Po314; (b) Po116; (c) Po134; (d) Po413; (e) Po611; (f) Po431; (g) Po341; (h) Po161; (i) Po143.

Table S2. The summary of the chemical and phase compositions of the considered materials, along with the fitting parameters.

| Name of sample | Nominal chemical composition                                       | Estimated chemical composition (ICP-OES)                                | Estimated chemical composition (EDX)                                    | GoF  | Other phases in material                         | wRp  |
|----------------|--------------------------------------------------------------------|-------------------------------------------------------------------------|-------------------------------------------------------------------------|------|--------------------------------------------------|------|
| Po314          | Co <sub>3</sub> Fe <sub>1.5</sub> Ni <sub>4.5</sub> S <sub>8</sub> | Co <sub>3.11</sub> Fe <sub>1.46</sub> Ni <sub>5.93</sub> S <sub>8</sub> | Co <sub>2.39</sub> Fe <sub>1.34</sub> Ni <sub>4.27</sub> S <sub>8</sub> | 1.26 | -                                                | 2.61 |
| In314          |                                                                    |                                                                         | Co <sub>2.98</sub> Fe <sub>1.52</sub> Ni <sub>4.49</sub> S <sub>8</sub> |      |                                                  |      |
| Pe314          |                                                                    | Co <sub>3.37</sub> Fe <sub>1.67</sub> Ni <sub>5.07</sub> S <sub>8</sub> | Co <sub>3.07</sub> Fe <sub>1.46</sub> Ni <sub>4.47</sub> S <sub>8</sub> | 1.72 | 4% Fe                                            | 3.30 |
| Po116          | Co <sub>1.5</sub> Fe <sub>1.5</sub> Ni <sub>6</sub> S <sub>8</sub> | Co <sub>1.72</sub> Fe <sub>1.66</sub> Ni <sub>6.94</sub> S <sub>8</sub> | Co <sub>1.62</sub> Fe <sub>1.47</sub> Ni <sub>5.90</sub> S <sub>8</sub> | 3.40 | 3,7% NiS                                         | 5.55 |
| In116          |                                                                    |                                                                         | Co <sub>1.55</sub> Fe <sub>1.56</sub> Ni <sub>5.89</sub> S <sub>8</sub> |      |                                                  |      |
| Pe116          |                                                                    | Co <sub>1.47</sub> Fe <sub>1.45</sub> Ni <sub>6.01</sub> S <sub>8</sub> | Co <sub>1.61</sub> Fe <sub>1.54</sub> Ni <sub>5.85</sub> S <sub>8</sub> | 6,33 | 12,1% NiS                                        | 7.06 |
| Po134          | Co <sub>1.5</sub> Fe <sub>3</sub> Ni <sub>4.5</sub> S <sub>8</sub> | Co <sub>1.76</sub> Fe <sub>3.64</sub> Ni <sub>5.19</sub> S <sub>8</sub> | Co <sub>1.59</sub> Fe <sub>3.06</sub> Ni <sub>4.36</sub> S <sub>8</sub> | 1.37 | -                                                | 3.08 |
| In134          |                                                                    |                                                                         | Co <sub>1.51</sub> Fe <sub>2.93</sub> Ni <sub>4.56</sub> S <sub>8</sub> |      |                                                  |      |
| Pe134          |                                                                    | Co <sub>1.54</sub> Fe <sub>2.97</sub> Ni <sub>4.63</sub> S <sub>8</sub> | Co <sub>1.52</sub> Fe <sub>3.07</sub> Ni <sub>4.41</sub> S <sub>8</sub> | 1.77 | 3% Fe                                            | 3.54 |
| Po413          | Co <sub>4.5</sub> Fe <sub>1.5</sub> Ni <sub>3</sub> S <sub>8</sub> | Co <sub>4.65</sub> Fe <sub>1.29</sub> Ni <sub>4.70</sub> S <sub>8</sub> | Co <sub>4.51</sub> Fe <sub>1.46</sub> Ni <sub>3.03</sub> S <sub>8</sub> | 1.58 | -                                                | 2.91 |
| In413          |                                                                    |                                                                         | Co <sub>4.41</sub> Fe <sub>1.51</sub> Ni <sub>3.01</sub> S <sub>8</sub> |      |                                                  |      |
| Pe413          |                                                                    | Co <sub>1.54</sub> Fe <sub>2.97</sub> Ni <sub>4.63</sub> S <sub>8</sub> | Co <sub>4.47</sub> Fe <sub>1.52</sub> Ni <sub>3.01</sub> S <sub>8</sub> | 1.91 | -                                                | 3.05 |
| Po611          | Co <sub>6</sub> Fe <sub>1.5</sub> Ni <sub>1.5</sub> S <sub>8</sub> | Co <sub>6.66</sub> Fe <sub>1.16</sub> Ni <sub>2.57</sub> S <sub>8</sub> | Co <sub>5.99</sub> Fe <sub>1.54</sub> Ni <sub>1.47</sub> S <sub>8</sub> | 1.09 | -                                                | 2.55 |
| In611          |                                                                    |                                                                         | Co <sub>5.95</sub> Fe <sub>1.50</sub> Ni <sub>1.55</sub> S <sub>8</sub> |      |                                                  |      |
| Pe611          |                                                                    | Co <sub>6.05</sub> Fe <sub>1.63</sub> Ni <sub>1.47</sub> S <sub>8</sub> | Co <sub>5.93</sub> Fe <sub>1.56</sub> Ni <sub>1.51</sub> S <sub>8</sub> | 1.28 | -                                                | 2.56 |
| Po431          | Co <sub>4.5</sub> Fe <sub>3</sub> Ni <sub>1.5</sub> S <sub>8</sub> | Co <sub>5.15</sub> Fe <sub>3.07</sub> Ni <sub>2.26</sub> S <sub>8</sub> | Co <sub>4.53</sub> Fe <sub>2.96</sub> Ni <sub>1.51</sub> S <sub>8</sub> | 1.25 | -                                                | 2.95 |
| In431          |                                                                    |                                                                         | Co <sub>4.68</sub> Fe <sub>2.75</sub> Ni <sub>1.57</sub> S <sub>8</sub> |      |                                                  |      |
| Pe431          |                                                                    | Co <sub>4.48</sub> Fe <sub>3.06</sub> Ni <sub>1.51</sub> S <sub>8</sub> | Co <sub>4.15</sub> Fe <sub>2.35</sub> Ni <sub>1.50</sub> S <sub>8</sub> | 1.03 | 15,3%<br>Pyrrhotite (FeS)                        | 2.25 |
| Po341          | Co <sub>3</sub> Fe <sub>4.5</sub> Ni <sub>1.5</sub> S <sub>8</sub> | Co <sub>3.72</sub> Fe <sub>5.41</sub> Ni <sub>1.87</sub> S <sub>8</sub> | Co <sub>3.15</sub> Fe <sub>4.51</sub> Ni <sub>1.34</sub> S <sub>8</sub> | 1.51 | 5,7% Pyrrhotite (FeS)                            | 2.83 |
| In341          |                                                                    |                                                                         | Co <sub>3.42</sub> Fe <sub>3.85</sub> Ni <sub>1.75</sub> S <sub>8</sub> |      |                                                  |      |
| Pe341          |                                                                    | Co <sub>3.24</sub> Fe <sub>5.08</sub> Ni <sub>1.55</sub> S <sub>8</sub> | Co <sub>2.94</sub> Fe <sub>3.42</sub> Ni <sub>1.63</sub> S <sub>8</sub> | 1.07 | 22% Troilite (FeS)                               | 2.46 |
| Po161          | Co <sub>1.5</sub> Fe <sub>6</sub> Ni <sub>1.5</sub> S <sub>8</sub> | Co <sub>1.69</sub> Fe <sub>7.27</sub> Ni <sub>1.59</sub> S <sub>8</sub> | Co <sub>1.66</sub> Fe <sub>6.03</sub> Ni <sub>1.31</sub> S <sub>8</sub> | 1.60 | 4,8% Fe +<br>24,3% Troilite (FeS)                | 2.64 |
| In161          |                                                                    |                                                                         | Co <sub>1.46</sub> Fe <sub>5.29</sub> Ni <sub>2.25</sub> S <sub>8</sub> |      |                                                  |      |
| Pe161          |                                                                    | Co <sub>1.72</sub> Fe <sub>7.39</sub> Ni <sub>1.68</sub> S <sub>8</sub> | Co <sub>1.25</sub> Fe <sub>5.58</sub> Ni <sub>1.16</sub> S <sub>8</sub> | 1.62 | 35,3% Troilite (FeS) + 11,3%<br>Pyrrhotite (FeS) | 2.64 |
| Po143          | Co <sub>1.5</sub> Fe <sub>4.5</sub> Ni <sub>3</sub> S <sub>8</sub> | Co <sub>1.81</sub> Fe <sub>5.05</sub> Ni <sub>3.97</sub> S <sub>8</sub> | Co <sub>1.67</sub> Fe <sub>4.71</sub> Ni <sub>2.62</sub> S <sub>8</sub> | 2.12 | -                                                | 3.63 |
| In143          |                                                                    |                                                                         | Co <sub>1.59</sub> Fe <sub>4.08</sub> Ni <sub>3.33</sub> S <sub>8</sub> |      |                                                  |      |
| Pe143          |                                                                    | Co <sub>1.52</sub> Fe <sub>4.87</sub> Ni <sub>3.00</sub> S <sub>8</sub> | Co <sub>1.38</sub> Fe <sub>3.99</sub> Ni <sub>2.63</sub> S <sub>8</sub> | 1.26 | 16,9%<br>Pyrrhotite (FeS)                        | 2.79 |

The lattice constants as well as formation energy are presented in Table S2. After the relaxation process the volume changes up to 2% - increasing with the addition of Ni and decreases when adding either Fe or Co.

[illegible]



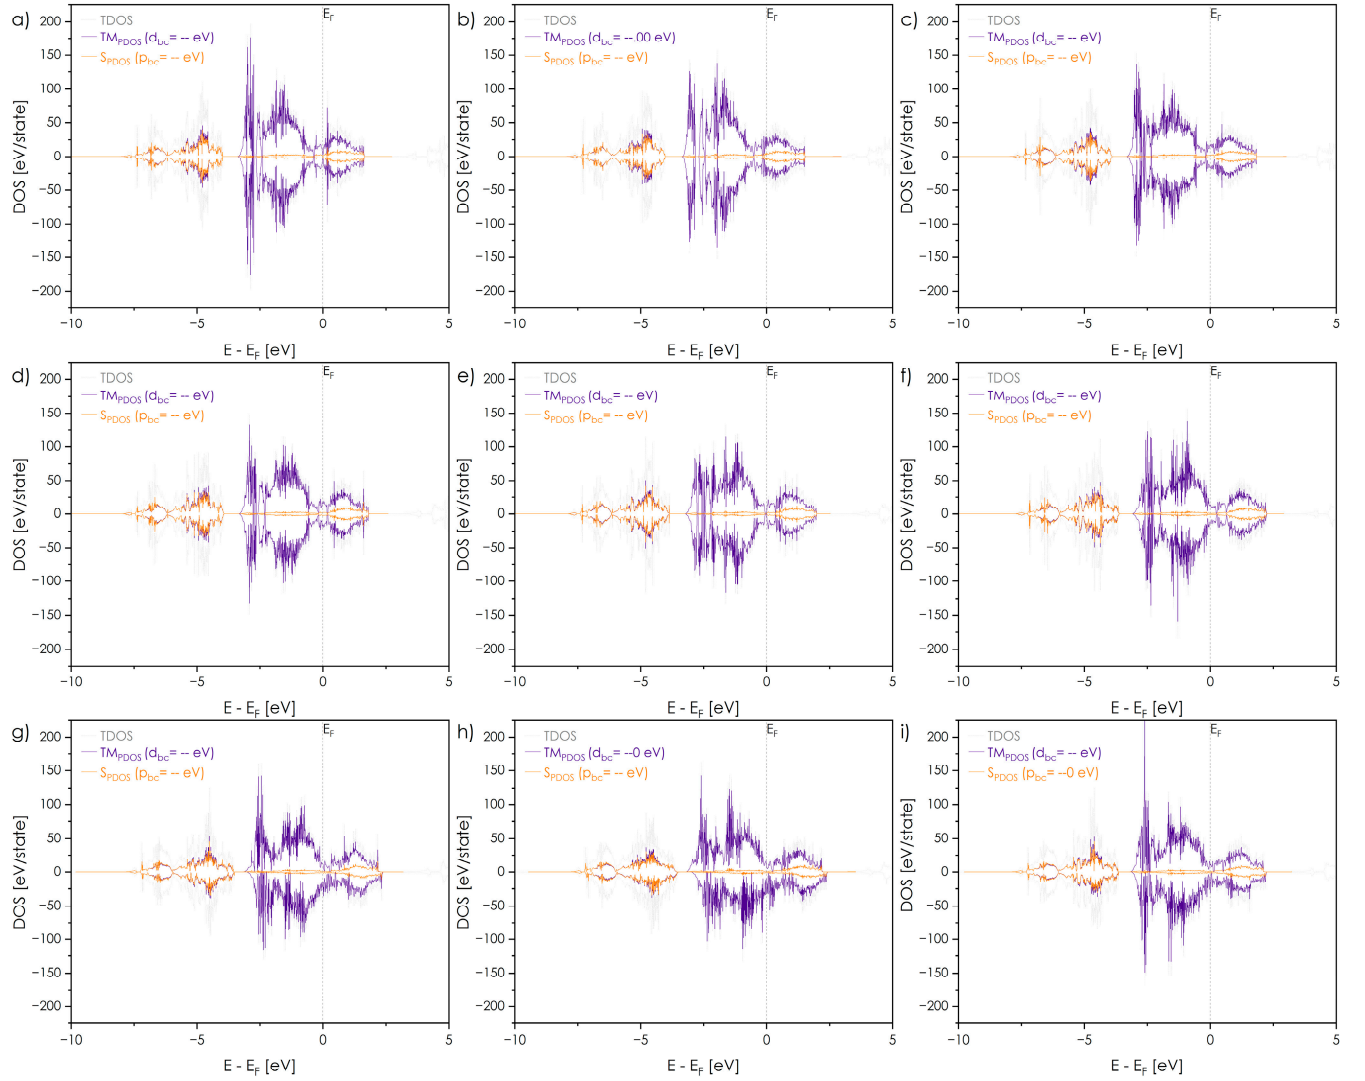

Figure S6. Total and partial density of states of examined materials: "314" (a), "116" (b), "134" (c), "413" (d), "611" (e), "431" (f), "341" (g), "161" (h), "143" (i).

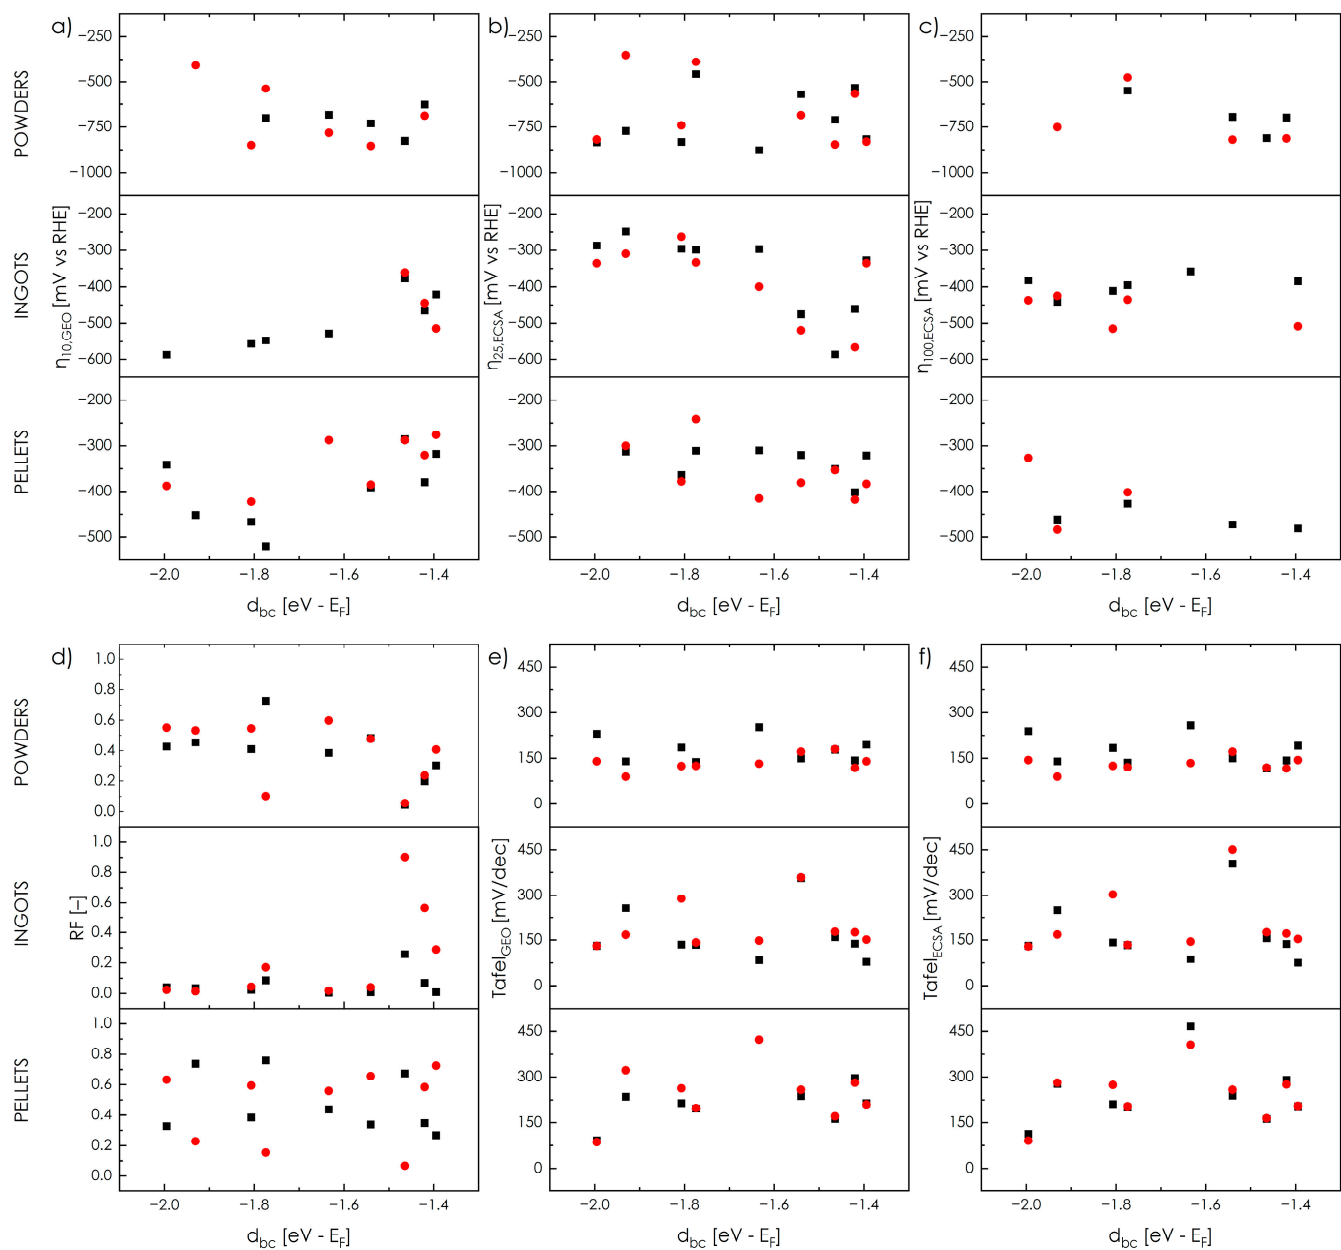

Figure S7. Benchmarking parameters as a function of calculated  $d_{bc}$  of examined materials: overpotential: at 10 mA/cm<sup>2</sup> normalized to geometric area (a), at 25 mA/cm<sup>2</sup> normalized to ECSA (b), at 100 mA/cm<sup>2</sup> normalized to ECSA (c); roughness factor (d), Tafel slope for current densities normalized to geometric area (e) and ECSA (f).

### 3. Electrochemical testing

Electrochemical measurements procedure. Linear sweep voltammetry (LSV) measurements were conducted in a three-electrode system, with a powder/ingot/pellet acting as working electrode, a platinum black electrode (Pt + Pt black) as a counter-electrode, and a silver chloride electrode (Ag/AgCl 3M KCl) as a reference electrode respectively. Measurements were performed in 0.5M H<sub>2</sub>SO<sub>4</sub> as electrolyte on electrochemical measurement equipment (MTM-ANKO) at room temperature.

The electrochemical measurement was divided into several steps. The first was electrochemical cleaning of the electrode surface, by measuring the linear sweep voltammetry (LSV) twenty times in the potential range from -200 to 200 [mV] at a scan rate of 200 [mVs<sup>-1</sup>]. This was followed by electrochemical active surface area (ECSA) measurements based on double layer capacitance (C<sub>dl</sub>) measurements. For this measurement, cyclic voltammetry (CV) was used in the non-Faraday range of potential difference [mV] from a scan rate of 2.1 [mVs<sup>-1</sup>] to 500 [mVs<sup>-1</sup>]. This yielded a function of charge current on scan rate (denoted C<sub>dl</sub>), and this value divided by specific capacitance of 0.035 [mFcm<sup>-2</sup>] gives the ECSA value [31]. Next, the two-hour chronoamperometry measurements with a preset potential difference of -600 (-800 for powder samples) [mV] were carried out as the main indicator of materials' stability. After the stability tests, the entire LSV measurement procedure was repeated and denoted as "post". The CV measurements together with estimated C<sub>DL</sub> values are presented in Figures S9–S15. Tafel Slope values were extracted from the obtained LSV measurements by logarithmizing the current density curves and performing linear fit in the potential ranges where the j-E response was linear resulting in equation (S1).

$$\log J = \log J_0 + a\eta, \quad (S1)$$

where  $J_0$  – exchange current density,  $a$  – Tafel slope,  $\eta$  – overpotential. The exchange current density as well as Tafel slope values were taken as the intercept and slope of the linear fit, respectively. The summary of recorded ECSA, roughness factor (RF), the overpotentials at certain current densities and normalized to ECSA or geometric area, estimated Tafel slope values, and  $J_0$  are presented in Tables S4–S6.

Electrical impedance spectroscopy (EIS) measurements were carried out to determine the charge transfer resistance (R<sub>CT</sub>) and presented in Table S6. The model used in this study was a circuit consisting of a resistor, a capacitor and a Warburg element, and the measurement itself was carried out between 1 [Hz] and 50 [kHz]. These measurements were carried out on a *Gamry Interface 1010E*. As can be seen in **Error! Reference source not found.**, the resistance of the sintered samples (Pellet) is an order of magnitude lower than that of the merely synthesized samples (Ingot), and especially compared to powder samples. The smallest decrease was recorded for the most multi-phase material, which is due to the new pseudo-FeS phases precipitated in the material. For the other materials, a significant decrease in resistivity can be observed after the IHP sintering process. The materials studied have significant charge carrier density and cation mobility, and sintering densifies the material and further improves the mobility of carriers within the grains [9] [9]. The relationship of the proportion of individual transition metals to the resistance of the samples can also be seen. In samples where the proportion of iron is predominant (In431, In341, In161, In143), the resistance is noticeably lower than in other samples. An inverse relationship can be observed in samples with predominantly nickel. After sintering, no definite relationship can be seen, which is due to the precipitation of new phases in the material, and the results themselves are close to the error limit. The powder samples were deposited on screen-printed electrodes, so their results are affected by the substrate.



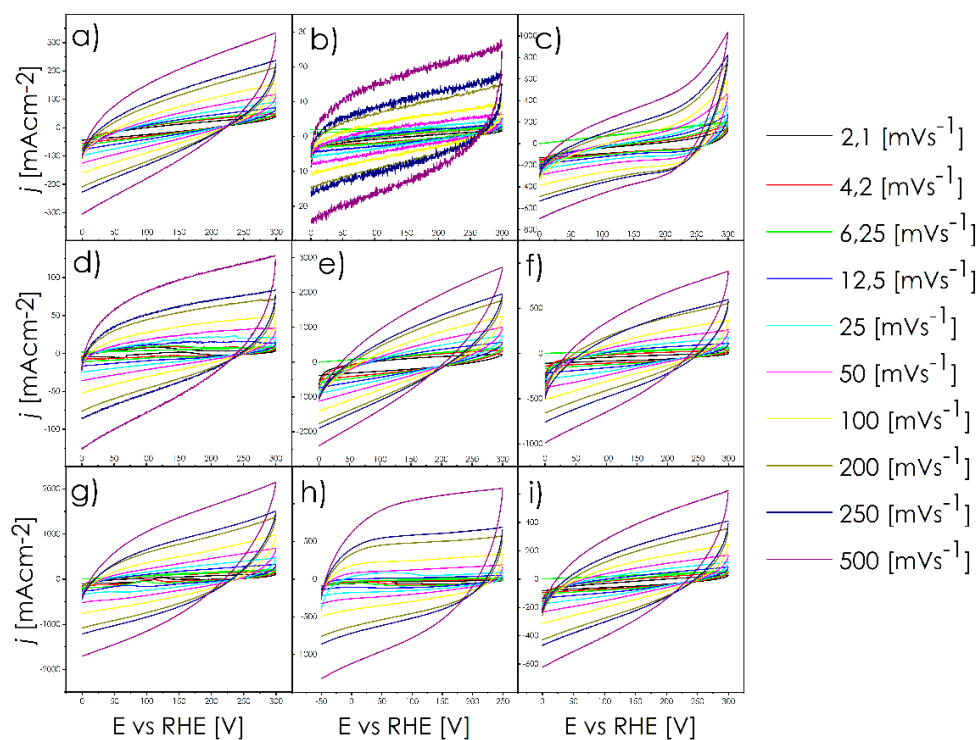

Figure S82. CV voltammograms with different scan rates for determining ECSA before/after stability tests for "pre"  
 (a) Pe314; (b) Pe116; (c) Pe134; (d) Pe413; (e) Pe611; (f) Pe431; (g) Pe341; (h) Pe161; (i) Pe143.

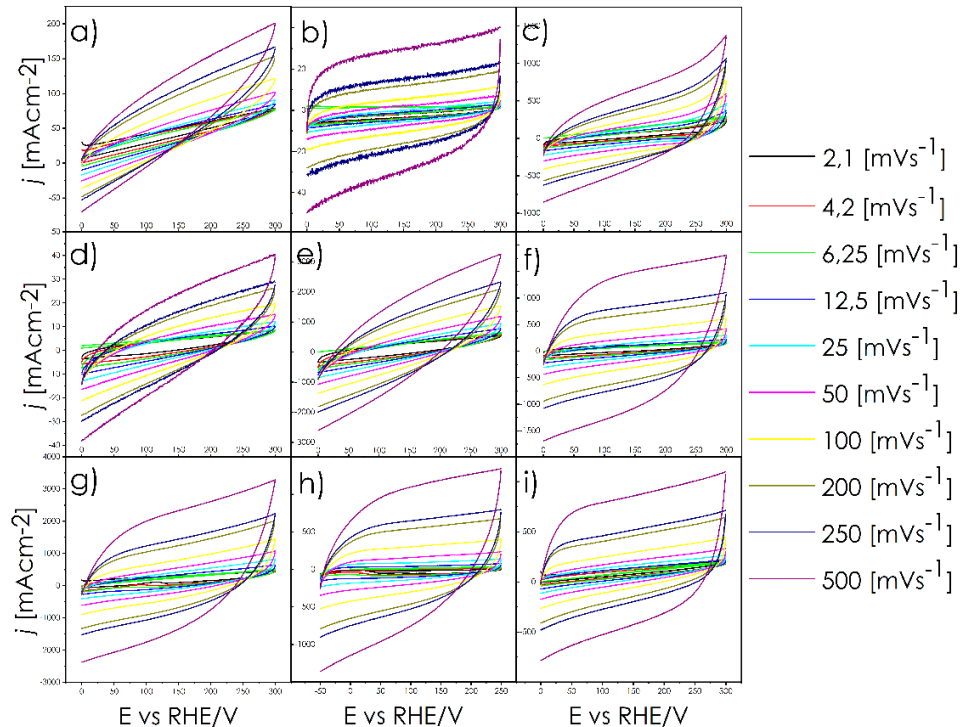

Figure S93. CV voltammograms with different scan rates for determining ECSA before/after stability tests for "post"  
 (a) Pe314; (b) Pe116; (c) Pe134; (d) Pe413; (e) Pe611; (f) Pe431; (g) Pe341; (h) Pe161; (i) Pe143.

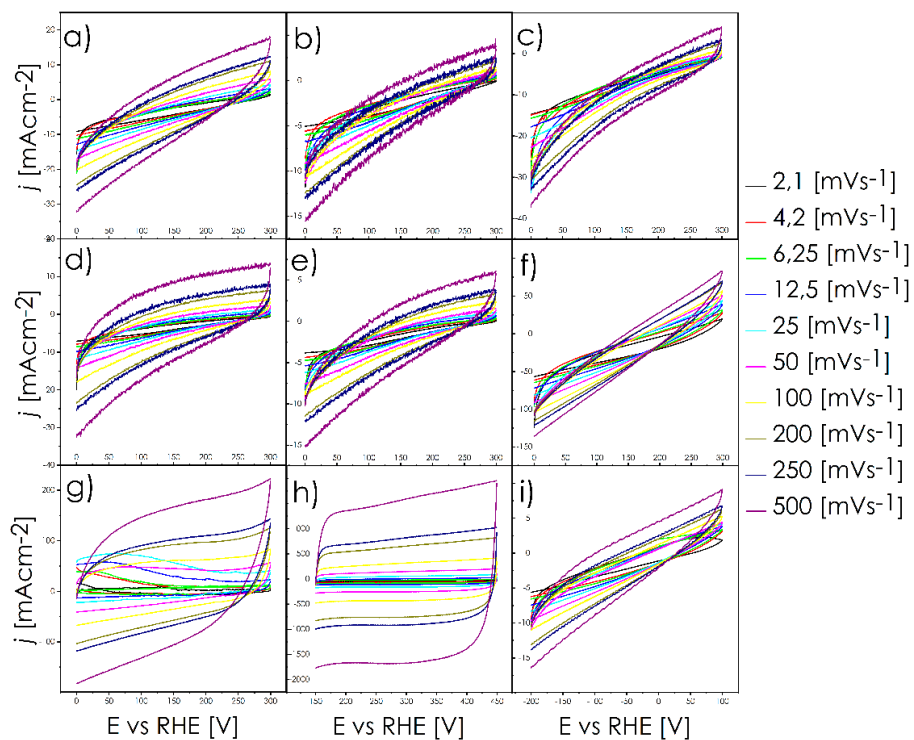

Figure S104. CV voltammograms with different scan rates for determining ECSA before/after stability tests for "pre"  
 (a) In314; (b) In116; (c) In134; (d) In413; (e) In611; (f) In431; (g) In341; (h) In161; (i) In143.

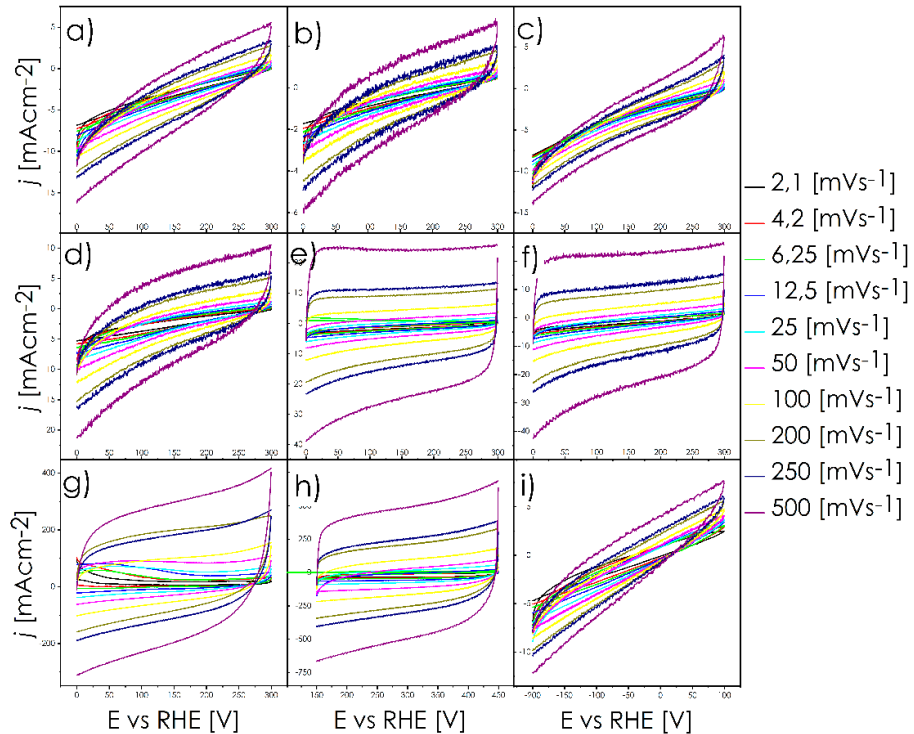

Figure S115. CV voltammograms with different scan rates for determining ECSA before/after stability tests for "post"  
 (a) In314; (b) In116; (c) In134; (d) In413; (e) In611; (f) In431; (g) In341; (h) In161; (i) In143.

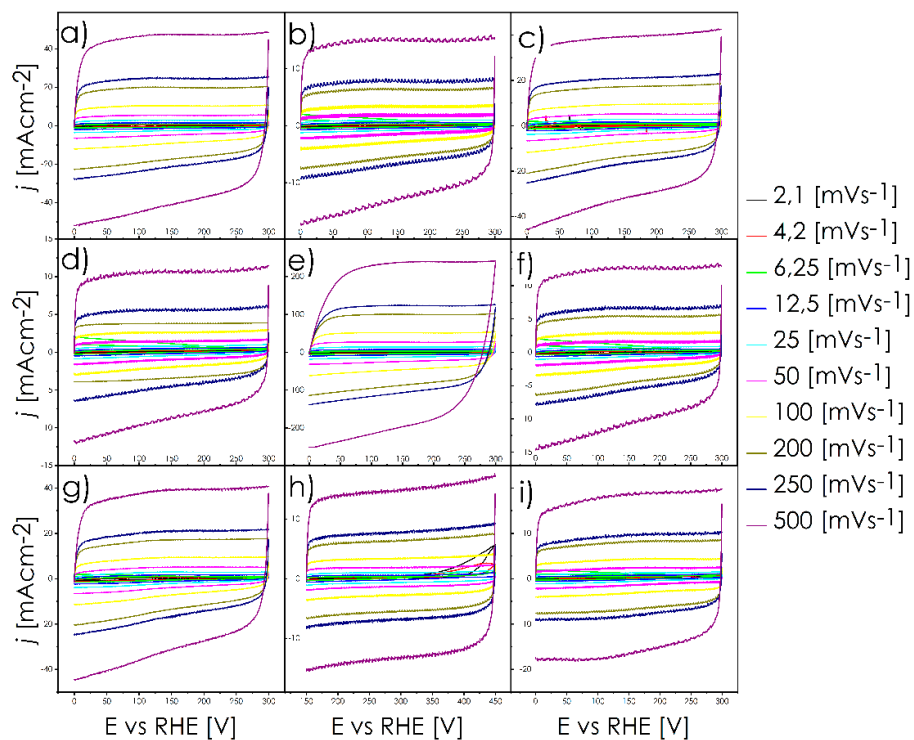

Figure S126. CV voltammograms with different scan rates for determining ECSA before/after stability tests for "pre"  
 (a) Po314; (b) Po116; (c) Po134; (d) Po413; (e) Po611; (f) Po431; (g) Po341; (h) Po161; (i) Po143.

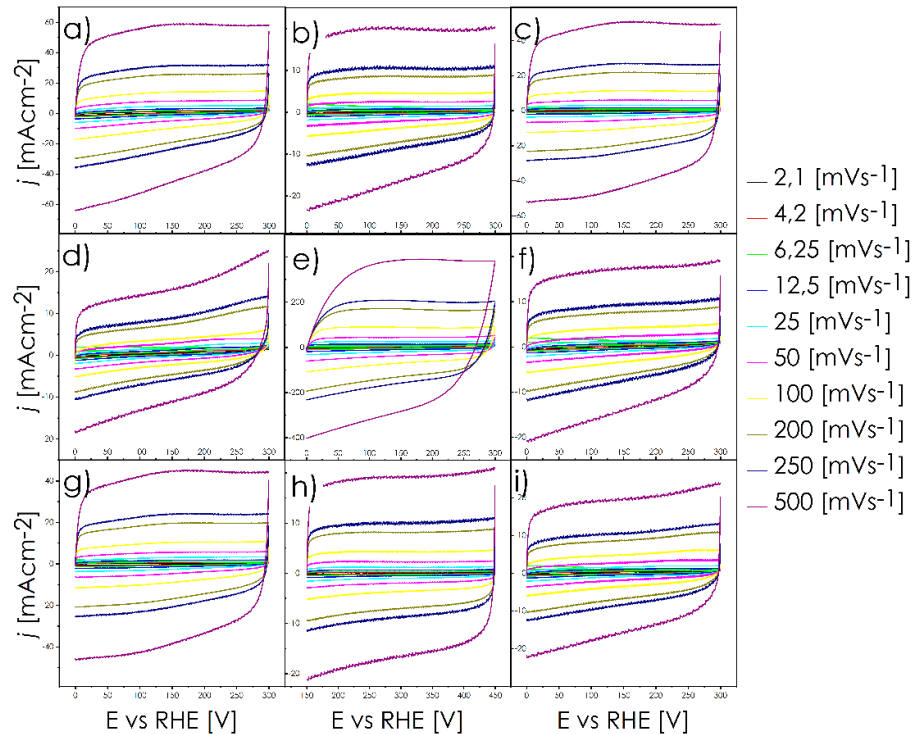

Figure S137. CV voltammograms with different scan rates for determining ECSA before/after stability tests for "post"  
 (a) Po314; (b) Po116; (c) Po134; (d) Po413; (e) Po611; (f) Po431; (g) Po341; (h) Po161; (i) Po143.



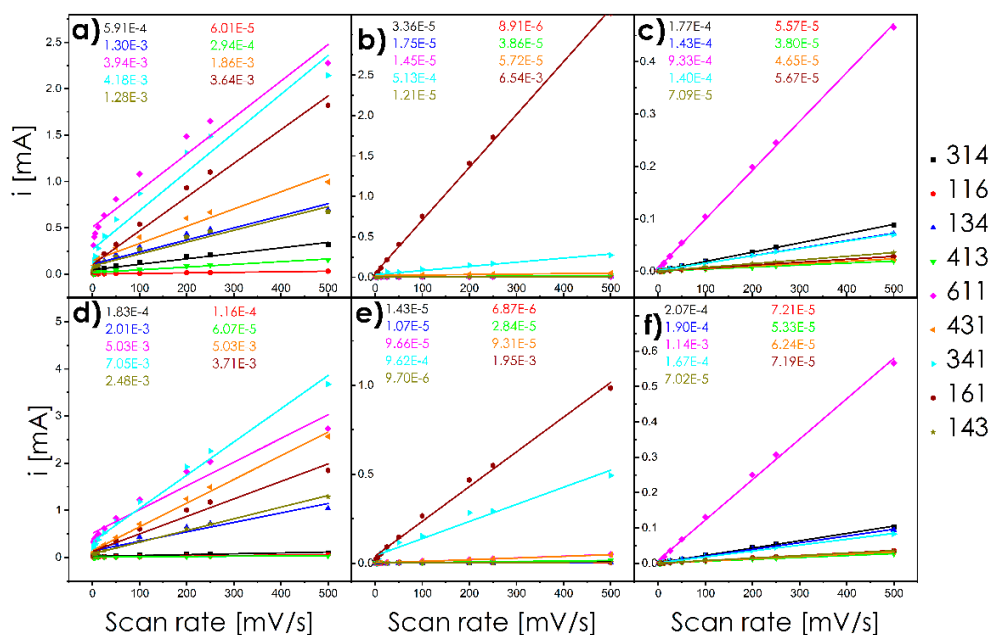

Figure S148. Charging current densities representing  $C_{dl}$  values for (a) pellets before chronoamperometry; (b) ingots before chronoamperometry; (c) powders before chronoamperometry; (d) pellets after chronoamperometry; (e) ingots after chronoamperometry; (f) powders after chronoamperometry.

Table S4. ECSA and RF values for all samples before and after the stability tests.

| Sample | Working area [cm <sup>2</sup> ] | Samples "pre"           |                       | Samples "post"          |                       | Activation process |
|--------|---------------------------------|-------------------------|-----------------------|-------------------------|-----------------------|--------------------|
|        |                                 | ECSA [cm <sup>2</sup> ] | RF (-)                | ECSA [cm <sup>2</sup> ] | RF (-)                |                    |
| Pe314  | 156.07·10 <sup>-3</sup>         | 1,69·10 <sup>-2</sup>   | 1,08·10 <sup>-1</sup> | 5,21·10 <sup>-3</sup>   | 3,34·10 <sup>-2</sup> | -                  |
| Pe116  | 120.80·10 <sup>-3</sup>         | 1,72·10 <sup>-3</sup>   | 1,42·10 <sup>-2</sup> | 3,32·10 <sup>-3</sup>   | 2,75·10 <sup>-2</sup> | +                  |
| Pe134  | 217.34·10 <sup>-3</sup>         | 3,72·10 <sup>-2</sup>   | 1,71·10 <sup>-1</sup> | 5,73·10 <sup>-2</sup>   | 2,64·10 <sup>-1</sup> | +                  |
| Pe413  | 217.76·10 <sup>-3</sup>         | 8,59·10 <sup>-3</sup>   | 3,94·10 <sup>-2</sup> | 1,74·10 <sup>-3</sup>   | 8,01·10 <sup>-3</sup> | -                  |
| Pe611  | 186.05·10 <sup>-3</sup>         | 1,13·10 <sup>-1</sup>   | 6,05·10 <sup>-1</sup> | 1,44·10 <sup>-1</sup>   | 7,73·10 <sup>-1</sup> | +                  |
| Pe431  | 127.00·10 <sup>-3</sup>         | 5,31·10 <sup>-2</sup>   | 4,18·10 <sup>-1</sup> | 1,44·10 <sup>-1</sup>   | 1,13                  | +                  |
| Pe341  | 250.66·10 <sup>-3</sup>         | 1,19·10 <sup>-1</sup>   | 4,77·10 <sup>-1</sup> | 2,01·10 <sup>-1</sup>   | 8,04·10 <sup>-1</sup> | +                  |
| Pe161  | 113.56·10 <sup>-3</sup>         | 1,14·10 <sup>-1</sup>   | 9,15·10 <sup>-1</sup> | 1,06·10 <sup>-1</sup>   | 0,93·10 <sup>-1</sup> | -                  |
| Pe143  | 181.35·10 <sup>-3</sup>         | 3,65·10 <sup>-2</sup>   | 2,01·10 <sup>-1</sup> | 7,08·10 <sup>-2</sup>   | 3,90·10 <sup>-1</sup> | +                  |
| In314  | 187.87·10 <sup>-3</sup>         | 9,61·10 <sup>-4</sup>   | 5,12·10 <sup>-3</sup> | 4,09·10 <sup>-4</sup>   | 2,17·10 <sup>-3</sup> | -                  |
| In116  | 144.30·10 <sup>-3</sup>         | 2,54·10 <sup>-4</sup>   | 1,76·10 <sup>-3</sup> | 1,96·10 <sup>-4</sup>   | 1,36·10 <sup>-3</sup> | -                  |
| In134  | 51.27·10 <sup>-3</sup>          | 5,00·10 <sup>-4</sup>   | 9,76·10 <sup>-3</sup> | 3,06·10 <sup>-4</sup>   | 5,97·10 <sup>-3</sup> | -                  |
| In413  | 245.94·10 <sup>-3</sup>         | 1,10·10 <sup>-3</sup>   | 4,48·10 <sup>-3</sup> | 8,11·10 <sup>-4</sup>   | 3,30·10 <sup>-3</sup> | -                  |
| In611  | 71.54·10 <sup>-3</sup>          | 4,14·10 <sup>-4</sup>   | 5,78·10 <sup>-3</sup> | 2,76·10 <sup>-3</sup>   | 3,86·10 <sup>-2</sup> | +                  |
| In431  | 139.91·10 <sup>-3</sup>         | 1,63·10 <sup>-3</sup>   | 1,17·10 <sup>-2</sup> | 2,66·10 <sup>-3</sup>   | 1,90·10 <sup>-2</sup> | +                  |
| In341  | 153.37·10 <sup>-3</sup>         | 1,47·10 <sup>-2</sup>   | 9,56·10 <sup>-2</sup> | 2,75·10 <sup>-2</sup>   | 1,79·10 <sup>-1</sup> | +                  |
| In161  | 237.49·10 <sup>-3</sup>         | 8,30·10 <sup>-2</sup>   | 3,50·10 <sup>-1</sup> | 1,65·10 <sup>-1</sup>   | 6,96·10 <sup>-1</sup> | +                  |
| In143  | 115.05·10 <sup>-3</sup>         | 3,01·10 <sup>-4</sup>   | 3,67·10 <sup>-3</sup> | 2,77·10 <sup>-4</sup>   | 2,41·10 <sup>-3</sup> | -                  |
| Po314  | 66.61·10 <sup>-3</sup>          | 5,06·10 <sup>-3</sup>   | 7,59·10 <sup>-2</sup> | 5,92·10 <sup>-3</sup>   | 8,89·10 <sup>-2</sup> | +                  |

|       |                       |                      |                      |                      |                      |   |
|-------|-----------------------|----------------------|----------------------|----------------------|----------------------|---|
| Po116 | $61.10 \cdot 10^{-3}$ | $1.59 \cdot 10^{-3}$ | $2.61 \cdot 10^{-2}$ | $2.06 \cdot 10^{-3}$ | $3.37 \cdot 10^{-2}$ | + |
| Po134 | $73.83 \cdot 10^{-3}$ | $4.08 \cdot 10^{-3}$ | $5.53 \cdot 10^{-2}$ | $5.43 \cdot 10^{-3}$ | $7.35 \cdot 10^{-2}$ | + |
| Po413 | $76.97 \cdot 10^{-3}$ | $1.09 \cdot 10^{-3}$ | $1.41 \cdot 10^{-2}$ | $1.52 \cdot 10^{-3}$ | $1.98 \cdot 10^{-3}$ | + |
| Po611 | $28.01 \cdot 10^{-3}$ | $2.49 \cdot 10^{-2}$ | $8.90 \cdot 10^{-1}$ | $3.86 \cdot 10^{-2}$ | 1,38                 | + |
| Po431 | $66.59 \cdot 10^{-3}$ | $1.33 \cdot 10^{-3}$ | $2.00 \cdot 10^{-2}$ | $1.78 \cdot 10^{-3}$ | $2.68 \cdot 10^{-2}$ | + |
| Po341 | $63.41 \cdot 10^{-3}$ | $4.00 \cdot 10^{-3}$ | $6.30 \cdot 10^{-2}$ | $4.76 \cdot 10^{-3}$ | $7.51 \cdot 10^{-2}$ | + |
| Po161 | $48.19 \cdot 10^{-3}$ | $1.62 \cdot 10^{-3}$ | $3.36 \cdot 10^{-2}$ | $2.05 \cdot 10^{-3}$ | $4.26 \cdot 10^{-2}$ | + |
| Po143 | $69.06 \cdot 10^{-3}$ | $2.02 \cdot 10^{-3}$ | $2.93 \cdot 10^{-2}$ | $2.01 \cdot 10^{-3}$ | $2.90 \cdot 10^{-2}$ | + |

Table S5. Summary of overpotentials for all pentlandite samples "pre" and "post" stability tests normalized to ECSA and geometric area.

| Sample  | $\eta_{\text{ECSA}}$ [mV]          |                                     |                                    |                                     | $\eta_{\text{geo}}$               |                                    |
|---------|------------------------------------|-------------------------------------|------------------------------------|-------------------------------------|-----------------------------------|------------------------------------|
| Pellets | "pre" 25<br>[mA/cm <sup>2</sup> ]  | "post" 25<br>[mA/cm <sup>2</sup> ]  | "pre" 100<br>[mA/cm <sup>2</sup> ] | "post" 100<br>[mA/cm <sup>2</sup> ] | "pre" 10<br>[mA/cm <sup>2</sup> ] | "post" 10<br>[mA/cm <sup>2</sup> ] |
| Pe314   | 312.54                             | 300.28                              | 461.33                             | 484.09                              | 451.71                            | -                                  |
| Pe116   | -*                                 | -*                                  | 69.21*                             | 326.54                              | 341.42                            | 387.81                             |
| Pe134   | 364.18                             | 378.18                              | -                                  | -                                   | 466.59                            | 422.82                             |
| Pe413   | 310.79                             | 241.64                              | 427.20                             | 401.82                              | 519.98                            | -                                  |
| Pe611   | 309.91                             | 415.82                              | -                                  | -                                   | 219.76*                           | 288.03*                            |
| Pe431   | 321.29                             | 383.44                              | 481.47                             | -                                   | 317.79                            | 275.78                             |
| Pe341   | 401.82                             | 418.45                              | -                                  | -                                   | 379.93                            | 320.42                             |
| Pe161   | 351.05                             | 353.68                              | ~244                               | -                                   | 285.40                            | 288.03                             |
| Pe143   | 320.42                             | 380.81                              | 472.71                             | -                                   | 391.31                            | 385.19                             |
| Ingots  | "pre" 100<br>[mA/cm <sup>2</sup> ] | "post" 100<br>[mA/cm <sup>2</sup> ] | "pre" 500<br>[mA/cm <sup>2</sup> ] | "post" 500<br>[mA/cm <sup>2</sup> ] | "pre" 10<br>[mA/cm <sup>2</sup> ] | "post" 10<br>[mA/cm <sup>2</sup> ] |
| In314   | 248.64                             | 309.91                              | 441.20                             | 424.57                              | -                                 | -                                  |
| In116   | 287.16                             | 335.30                              | 382.56                             | 436.83                              | 587.37                            | -                                  |
| In134   | 295.91                             | 262.65                              | 411.44                             | 514.73                              | 556.74                            | -                                  |
| In413   | 298.53                             | 333.54                              | 395.69                             | 435.08                              | 547.11                            | -                                  |
| In611   | 296.78                             | 400.07                              | 358.05                             | -                                   | 527.86                            | -                                  |
| In431   | 327.42                             | 335.30                              | 385.19                             | 507.72                              | 421.07                            | 513.85                             |
| In341   | 460.46                             | 566.37                              | -                                  | -                                   | 464.84                            | 444.70                             |
| In161   | 586.50                             | -                                   | -                                  | -                                   | 377.31                            | 360.68                             |
| In143   | 475.34                             | 519.10                              | -                                  | -                                   | -                                 | -                                  |
| Powders | "pre" 50<br>[mA/cm]                | "post" 50<br>[mA/cm]                | "pre" 250<br>[mA/cm]               | "post" 250<br>[mA/cm]               | "pre" 5<br>[mA/cm]                | "post" 5<br>[mA/cm]                |
| Po314   | 772.02                             | 350.77                              | -                                  | 750.77                              | -794.77                           | 357.02                             |
| Po116   | 833.27                             | 818.27                              | -                                  | -                                   | -                                 | -                                  |
| Po134   | 832.02                             | 740.77                              | -                                  | -                                   | -                                 | 770.77                             |
| Po413   | 457.02                             | 388.27                              | 550.77                             | 477.02                              | 580.77                            | 477.02                             |
| Po611   | 877.02                             | -                                   | -                                  | -                                   | 614.52                            | 728.27                             |
| Po431   | 817.02                             | 830.77                              | -                                  | -                                   | -                                 | -                                  |
| Po341   | 534.52                             | 568.27                              | 698.27                             | 813.27                              | 567.02                            | 594.52                             |
| Po161   | 710.77                             | 845.77                              | 810.77                             | -                                   | 773.27                            | -                                  |
| Po143   | 570.77                             | 684.52                              | 694.52                             | 819.52                              | 660.77                            | 789.52                             |

Table S6. Tafel slope and  $j_0$  (exchange current density) values of pentlandites samples "pre" and "post" stability tests.

| Sample | ECSA "pre"              |                                | ECSA "post"             |                                | Geo "pre"               |                                | Geo "post"              |                                |
|--------|-------------------------|--------------------------------|-------------------------|--------------------------------|-------------------------|--------------------------------|-------------------------|--------------------------------|
|        | Tafel slope<br>[mV/dec] | $J_0$<br>[mA/cm <sup>2</sup> ] |
| Pe314  | 277                     | 1222                           | 281                     | 1239                           | 235                     | 610                            | 322                     | 477                            |
| Pe116  | 113                     | 931                            | 91                      | 715                            | 92                      | 486                            | 86                      | 513                            |
| Pe134  | 211                     | 851                            | 274                     | 1012                           | 214                     | 589                            | 263                     | 688                            |
| Pe413  | 200                     | 930                            | 204                     | 1013                           | 196                     | 564                            | 198                     | 380                            |
| Pe611  | 466                     | 2179                           | 406                     | 1448                           | 537                     | 2055                           | 423                     | 1361                           |
| Pe431  | 204                     | 920                            | 205                     | 828                            | 214                     | 789                            | 210                     | 860                            |
| Pe341  | 291                     | 1010                           | 275                     | 955                            | 297                     | 823                            | 281                     | 912                            |
| Pe161  | 162                     | 773                            | 164                     | 760                            | 162                     | 750                            | 171                     | 764                            |
| Pe143  | 239                     | 1031                           | 258                     | 954                            | 237                     | 701                            | 258                     | 749                            |
| In314  | 250                     | 1719                           | 168                     | 1068                           | 257                     | 461                            | 167                     | 382                            |
| In116  | 131                     | 932                            | 129                     | 829                            | 131                     | 407                            | 131                     | 352                            |
| In134  | 142                     | 932                            | 303                     | 1983                           | 135                     | 411                            | 289                     | 417                            |
| In413  | 133                     | 854                            | 134                     | 858                            | 134                     | 400                            | 142                     | 397                            |
| In611  | 87                      | 753                            | 145                     | 808                            | 84                      | 481                            | 148                     | 504                            |
| In431  | 75                      | 665                            | 153                     | 935                            | 78                      | 476                            | 151                     | 511                            |
| In341  | 137                     | 677                            | 171                     | 757                            | 138                     | 491                            | 175                     | 567                            |
| In161  | 156                     | 709                            | 175                     | 697                            | 159                     | 603                            | 177                     | 656                            |
| In143  | 404                     | 1917                           | 450                     | 2270                           | 356                     | 202                            | 359                     | 180                            |
| Po314  | 140                     | 369                            | 89                      | 639                            | 140                     | 207                            | 89                      | 514                            |
| Po116  | 239                     | 598                            | 144                     | 266                            | 230                     | 154                            | 140                     | 163                            |
| Po134  | 184                     | 322                            | 125                     | 305                            | 185                     | 177                            | 124                     | 220                            |
| Po413  | 136                     | 2                              | 120                     | 648                            | 138                     | 334                            | 125                     | 406                            |
| Po611  | 258                     | 483                            | 134                     | 248                            | 252                     | 270                            | 132                     | 231                            |
| Po431  | 191                     | 297                            | 144                     | 258                            | 194                     | 152                            | 140                     | 154                            |
| Po341  | 143                     | 325                            | 116                     | 435                            | 143                     | 344                            | 118                     | 322                            |
| Po161  | 116                     | 510                            | 119                     | 301                            | 178                     | 761                            | 180                     | 171                            |
| Po143  | 150                     | 302                            | 171                     | 390                            | 149                     | 284                            | 171                     | 213                            |

Table S7. Charge-transfer resistance determined by means of EIS.

| Pellet |                         | Ingot  |                         | Powder |                         |
|--------|-------------------------|--------|-------------------------|--------|-------------------------|
| Sample | Resistance [ $\Omega$ ] | Sample | Resistance [ $\Omega$ ] | Sample | Resistance [ $\Omega$ ] |
| Pe314  | 14.87                   | In314  | 100.51                  | Po314  | 462.64                  |
| Pe116  | 8.01                    | In116  | 274.62                  | Po116  | 1200.09                 |
| Pe134  | 13.23                   | In134  | 190.12                  | Po134  | 361.89                  |
| Pe413  | 27.91                   | In413  | 101.31                  | Po413  | 863.72                  |
| Pe611  | 3.21                    | In611  | 111.65                  | Po611  | 228.51                  |
| Pe431  | 7.79                    | In431  | 64.87                   | Po431  | 815.16                  |
| Pe341  | 9.62                    | In341  | 70.28                   | Po341  | 371.86                  |
| Pe161  | 18.39                   | In161  | 19.39                   | Po161  | 364.75                  |
| Pe143  | 16.16                   | In143  | 56.57                   | Po143  | 40.18                   |

Table S8. Comparison of achieved currents to previously tested materials.



| Sample                                                                    | $\eta_{\text{ECSA}}$ [mV]<br>25 [mA/cm <sup>2</sup> ] |
|---------------------------------------------------------------------------|-------------------------------------------------------|
| Pe314                                                                     | 313                                                   |
| Pe116                                                                     | ~*                                                    |
| Pe134                                                                     | 364                                                   |
| Pe413                                                                     | 311                                                   |
| Pe611                                                                     | 310                                                   |
| Pe431                                                                     | 321                                                   |
| Pe341                                                                     | 402                                                   |
| Pe161                                                                     | 351                                                   |
| Pe143                                                                     | 320                                                   |
| TM <sub>9</sub> S <sub>8</sub> [17]                                       | ~270**                                                |
| TM <sub>9</sub> S <sub>7</sub> Se [17]                                    | ~250**                                                |
| TM <sub>9</sub> S <sub>6</sub> Se <sub>2</sub> [17]                       | ~275**                                                |
| TM <sub>9</sub> S <sub>5</sub> Se <sub>3</sub> [17]                       | ~280**                                                |
| TM <sub>9</sub> S <sub>4</sub> Se <sub>4</sub> [17]                       | ~220**                                                |
| TM <sub>9</sub> S <sub>3</sub> Se <sub>5</sub> [17]                       | ~225**                                                |
| Ni <sub>3</sub> Co <sub>6</sub> S <sub>8</sub> [15]                       | ~350**                                                |
| Fe <sub>4,5</sub> Ni <sub>4,5</sub> S <sub>8</sub> [15]                   | ~350**                                                |
| Fe <sub>3</sub> Co <sub>3</sub> Ni <sub>3</sub> S <sub>8</sub> [15]       | ~325**                                                |
| Fe <sub>3</sub> Co <sub>2</sub> Ni <sub>4</sub> S <sub>8</sub> [15]       | ~360**                                                |
| Fe <sub>3</sub> CoNi <sub>5</sub> S <sub>8</sub> [15]                     | ~350**                                                |
| Fe <sub>4</sub> Co <sub>3</sub> Ni <sub>2</sub> S <sub>8</sub> [15]       | ~375**                                                |
| FeCo <sub>5</sub> Ni <sub>3</sub> S <sub>8</sub> [15]                     | ~375**                                                |
| Fe <sub>2</sub> Co <sub>4</sub> Ni <sub>3</sub> S <sub>8</sub> [15]       | ~350**                                                |
| Fe <sub>1.6</sub> Co <sub>5.6</sub> Ni <sub>1.8</sub> S <sub>8</sub> [15] | ~360**                                                |

\* See "3.3. Co<sub>1.5</sub>Fe<sub>1.5</sub>Ni<sub>6</sub>S<sub>8</sub> phenomena"

\*\* Values taken from the figures
